# Supplementary material
Source: PubMed Central journal article supplement (PMC9082213)
Supplement: jin-0014-0124-s01.pdf [file jin-0014-0124-s01.pdf]

(S1a) AhR mRNA expression

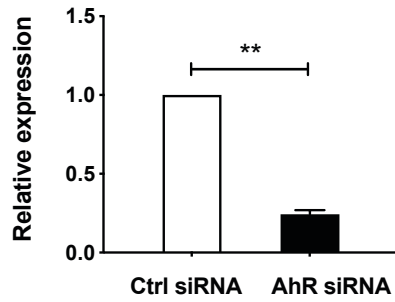

(S1b) Immunoblot

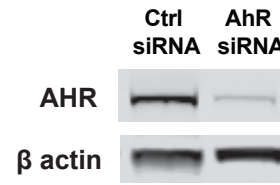

(S2a) Quantitative RT-PCR

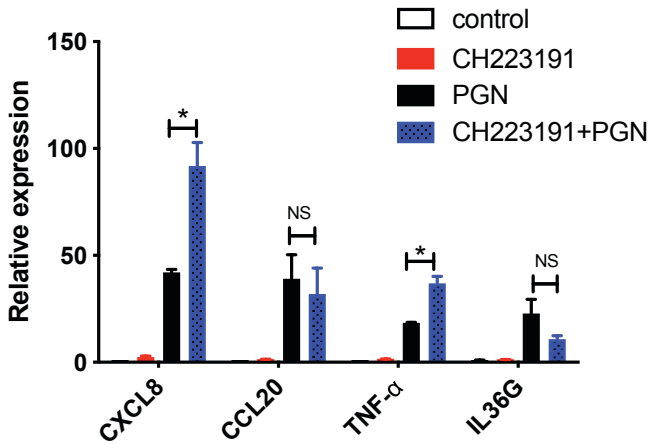

(S2b) Quantitative RT-PCR

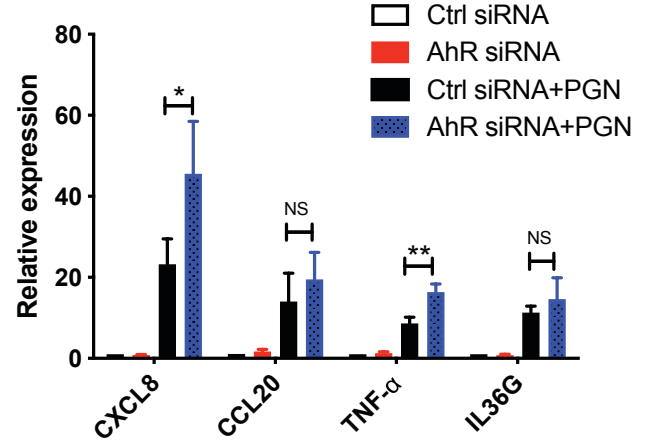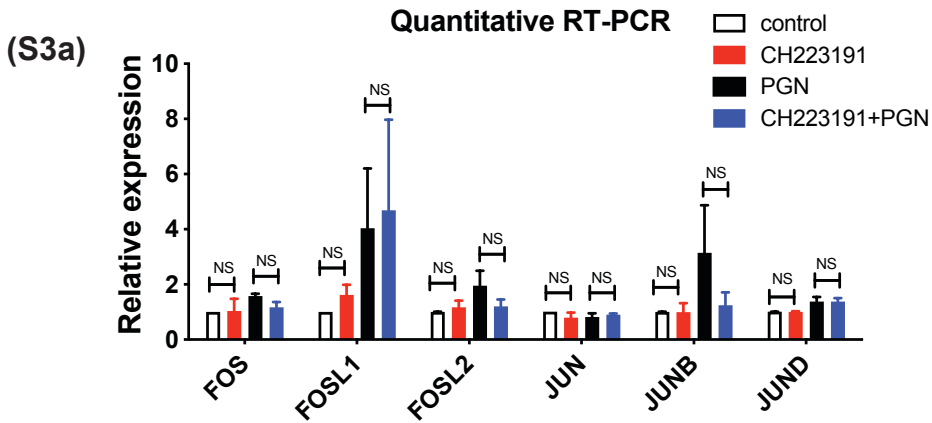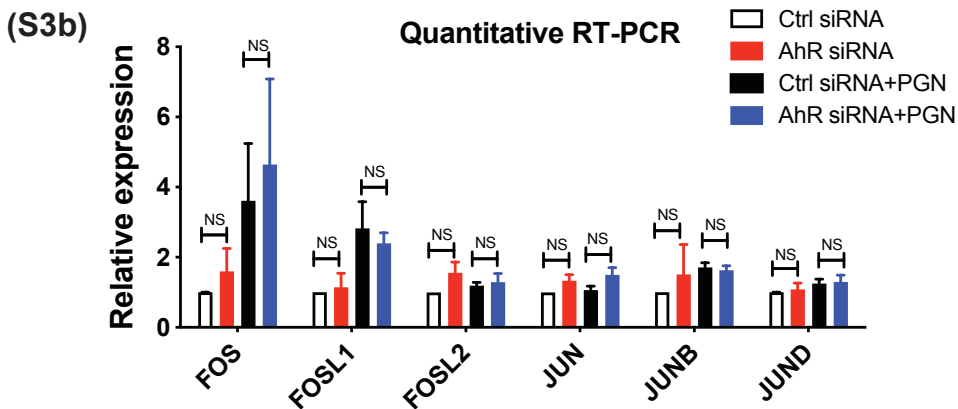

## Supplemental Figure Legends

**Supplemental Figure 1. Short interfering RNA-mediated knockdown of AhR.** (A) Quantitative RT-PCR of RNA from KCs after transfection with control (ctrl) or AhR targeting (AhR) siRNAs. (B) Immunoblot of AhR following transfection of siRNAs.

**Supplemental Figure 2. AhR mediates PGN-induced inflammation in human primary keratinocytes.** Quantitative RT-PCR after KCs were stimulated by PGN (20 µg/ml) for 3 h. (a) Cells were pretreated with CH223191 (10 µM) or vehicle for 1 h or (b) transfected with a control siRNA or an AHR-specific siRNA. For both experiments, n=3; two-sided t-test with error bars = SEM; \*  $p < 0.05$ , \*\*  $p < 0.01$ ; ns= not significant.

**Supplemental Figure 3. Effect of AhR on transcriptional expression of AP-1 family members after PGN stimulation.** Quantitative RT-PCR after KCs were stimulated by PGN (20 µg/ml) for 3 h. (a) Cells were pretreated with CH223191 (10 µM) or vehicle for 1 h or (b) transfected with a control siRNA or an AHR-specific siRNA. For both experiments, n=3; two-sided t-test with error bars = SEM; ns= not significant.

**Supplemental Table (following pages).** Differentially expressed genes identified by RNA-sequencing of Control vs. PGN-treated keratinocytes, Control vs. AHR-knockdown keratinocytes, and Control+PGN vs. AHR-knockdown+PGN keratinocytes. Differentially expressed genes were defined as those displaying an expression difference >1.5-fold, p-value <0.05 based on two-sided t-test, and minimum threshold of 5 read counts. Expression differences are displayed as a log<sub>2</sub> fold change values.

| Gene         | Fold Change (Control + PGN vs. Control) | P-value |
|--------------|-----------------------------------------|---------|
| SLC10A2      | 16.15                                   | 0.040   |
| CXCL8        | 13.39                                   | 0.004   |
| NR4A3        | 11.97                                   | 0.001   |
| CXCL3        | 11.57                                   | 0.001   |
| PDE4B        | 10.89                                   | 0.018   |
| CXCL1        | 10.32                                   | 0.006   |
| TNFSF18      | 8.79                                    | 0.020   |
| CSF2         | 8.56                                    | 0.003   |
| NR4A2        | 7.68                                    | 0.000   |
| TNF          | 7.50                                    | 0.011   |
| ARHGAP20     | 7.30                                    | 0.025   |
| LINC02273    | 7.17                                    | 0.006   |
| NR4A1        | 7.16                                    | 0.001   |
| POM121L8P    | 6.88                                    | 0.046   |
| LIF          | 6.83                                    | 0.004   |
| CXCL2        | 6.46                                    | 0.016   |
| APOBEC3A     | 5.95                                    | 0.010   |
| SPRR2F       | 5.79                                    | 0.025   |
| PDGFD        | 5.34                                    | 0.033   |
| SHISA2       | 5.23                                    | 0.015   |
| HAS1         | 5.20                                    | 0.027   |
| IL36G        | 5.15                                    | 0.003   |
| SOCS3        | 4.84                                    | 0.001   |
| CH25H        | 4.81                                    | 0.034   |
| CCL20        | 4.65                                    | 0.015   |
| PLAUR        | 4.56                                    | 0.022   |
| IER3         | 4.50                                    | 0.000   |
| MRPS9-AS1    | 4.39                                    | 0.023   |
| EREG         | 4.38                                    | 0.000   |
| TCTEX1D4     | 4.32                                    | 0.004   |
| TEX14        | 4.31                                    | 0.034   |
| LOC101927770 | 4.28                                    | 0.005   |
| FFAR2        | 4.26                                    | 0.009   |
| RPL21P44     | 3.92                                    | 0.031   |
| NOP53-AS1    | 3.91                                    | 0.025   |
| MAL2-AS1     | 3.90                                    | 0.034   |
| FRMD8P1      | 3.83                                    | 0.016   |
| LOC105371925 | 3.71                                    | 0.018   |
| SPRR2E       | 3.56                                    | 0.008   |
| S1PR3        | 3.55                                    | 0.001   |
| IL24         | 3.49                                    | 0.015   |
| SH2D4B       | 3.49                                    | 0.028   |
| FAM156A      | 3.35                                    | 0.028   |
| SPRR2C       | 3.35                                    | 0.016   |

|              |      |       |
|--------------|------|-------|
| FOSB         | 3.35 | 0.043 |
| LOC101927751 | 3.32 | 0.031 |
| GATA6        | 3.28 | 0.028 |
| LINC02551    | 3.26 | 0.015 |
| HSPA6        | 3.25 | 0.018 |
| MAP3K8       | 3.24 | 0.020 |
| TNFAIP3      | 3.17 | 0.020 |
| SPRR2B       | 3.13 | 0.007 |
| INHBA-AS1    | 3.07 | 0.039 |
| ZNF56        | 3.03 | 0.029 |
| PAPPA2       | 3.02 | 0.043 |
| SPRR2D       | 2.96 | 0.004 |
| SERPINA10    | 2.94 | 0.044 |
| CYP1A1       | 2.90 | 0.040 |
| IL13RA2      | 2.89 | 0.025 |
| SERPINB2     | 2.89 | 0.015 |
| C11orf96     | 2.83 | 0.038 |
| HS3ST1       | 2.75 | 0.002 |
| EPGN         | 2.67 | 0.006 |
| IL1A         | 2.61 | 0.018 |
| HECW2        | 2.59 | 0.031 |
| FOSL1        | 2.53 | 0.002 |
| IL1RL1       | 2.53 | 0.038 |
| TAGLN3       | 2.47 | 0.001 |
| PLAU         | 2.45 | 0.025 |
| SLC7A2       | 2.40 | 0.001 |
| LINC01599    | 2.39 | 0.038 |
| IL1B         | 2.38 | 0.002 |
| RCAN1        | 2.38 | 0.010 |
| SCHIP1       | 2.38 | 0.027 |
| TMCC3        | 2.34 | 0.041 |
| PPP1R15A     | 2.28 | 0.029 |
| TBX3         | 2.25 | 0.002 |
| STX11        | 2.18 | 0.027 |
| FAHD2CP      | 2.14 | 0.044 |
| TRPV3        | 2.07 | 0.021 |
| ATP6V1G2     | 2.06 | 0.041 |
| SPRY2        | 2.05 | 0.010 |
| C10orf55     | 1.99 | 0.008 |
| CDC42EP2     | 1.97 | 0.009 |
| RAB43        | 1.90 | 0.047 |
| TIPARP       | 1.90 | 0.007 |
| CEMIP2       | 1.90 | 0.029 |
| GJB4         | 1.79 | 0.020 |
| OASL         | 1.73 | 0.036 |

|             |       |       |
|-------------|-------|-------|
| GRAMD2B     | 1.70  | 0.038 |
| TNFAIP8     | 1.70  | 0.043 |
| AREG        | 1.68  | 0.014 |
| CHST2       | 1.67  | 0.032 |
| DUSP4       | 1.66  | 0.040 |
| F2RL1       | 1.64  | 0.044 |
| SGMS2       | 1.54  | 0.042 |
| HRH1        | 1.52  | 0.049 |
| ZNF200      | -1.52 | 0.037 |
| FAM217B     | -1.52 | 0.036 |
| ZNF429      | -1.54 | 0.043 |
| SLC9A3      | -1.56 | 0.032 |
| CAMKK1      | -1.58 | 0.043 |
| JRK         | -1.59 | 0.020 |
| THEM6       | -1.63 | 0.021 |
| WNT3        | -1.65 | 0.027 |
| ZNF181      | -1.68 | 0.034 |
| HOXC13      | -1.77 | 0.005 |
| ZNF420      | -1.80 | 0.028 |
| ZNF253      | -1.80 | 0.047 |
| BCL6        | -1.81 | 0.019 |
| CCDC39      | -1.87 | 0.035 |
| HEXIM2      | -1.88 | 0.041 |
| P2RY1       | -1.95 | 0.012 |
| SEMA6C      | -1.95 | 0.026 |
| OTUD1       | -1.97 | 0.021 |
| ZNF563      | -1.97 | 0.030 |
| ID3         | -2.02 | 0.004 |
| ZFP37       | -2.03 | 0.031 |
| LBX2-AS1    | -2.14 | 0.028 |
| PPIEL       | -2.14 | 0.015 |
| MYLIP       | -2.15 | 0.013 |
| FAM85A      | -2.17 | 0.032 |
| S1PR5       | -2.18 | 0.006 |
| MAF         | -2.20 | 0.031 |
| TOB1-AS1    | -2.20 | 0.018 |
| CD101       | -2.25 | 0.038 |
| SARM1       | -2.28 | 0.010 |
| ADH7        | -2.30 | 0.036 |
| ALOX12      | -2.30 | 0.035 |
| UBE2F-SCLY  | -2.32 | 0.014 |
| SEPTIN7-AS1 | -2.32 | 0.023 |
| EIF2AK3-DT  | -2.43 | 0.037 |
| SCOC-AS1    | -2.46 | 0.041 |
| TP73        | -2.56 | 0.028 |

|              |       |       |
|--------------|-------|-------|
| PDZD4        | -2.58 | 0.044 |
| OTUD7A       | -2.64 | 0.033 |
| SERPINE3     | -2.96 | 0.034 |
| TTC3-AS1     | -3.01 | 0.046 |
| CD248        | -3.07 | 0.024 |
| LINC02158    | -3.12 | 0.040 |
| ZNF807P      | -3.29 | 0.027 |
| LOC100270746 | -3.31 | 0.045 |
| LSMEM1       | -3.34 | 0.009 |
| LOC100506258 | -3.41 | 0.046 |
| ROPN1L       | -3.45 | 0.013 |
| PLAC8L1      | -3.60 | 0.013 |
| SOX21        | -3.70 | 0.036 |
| CEP170P1     | -4.03 | 0.014 |
| ELOVL3       | -4.10 | 0.044 |
| GFAP         | -4.98 | 0.035 |
| LOC653653    | -5.08 | 0.010 |
| LOC100499489 | -5.31 | 0.003 |
| ABCC6P2      | -5.77 | 0.011 |
| LOC105377342 | -5.95 | 0.017 |
| FXD1         | -7.48 | 0.009 |

| Gene         | Fold Change (AHR siRNA vs. Control siRNA) | P-value |
|--------------|-------------------------------------------|---------|
| AHR          | -3.40                                     | 0.002   |
| MYEOV        | -2.52                                     | 0.050   |
| S100A12      | -2.38                                     | 0.016   |
| GPAT3        | -1.96                                     | 0.034   |
| LINC00673    | -1.87                                     | 0.041   |
| IL1B         | -1.65                                     | 0.026   |
| TAGLN3       | 1.55                                      | 0.037   |
| LOC102724488 | 1.57                                      | 0.045   |
| HCP5         | 1.62                                      | 0.045   |
| APCDD1       | 1.63                                      | 0.019   |
| RAB15        | 1.64                                      | 0.031   |
| FN1          | 1.64                                      | 0.029   |
| S1PR3        | 1.78                                      | 0.033   |
| FBLN2        | 1.78                                      | 0.037   |
| CPAMD8       | 1.99                                      | 0.024   |
| LINC00965    | 2.01                                      | 0.046   |
| LINC02709    | 2.01                                      | 0.049   |
| FZD8         | 2.03                                      | 0.036   |
| TUBAL3       | 2.04                                      | 0.047   |
| H2BC11       | 2.06                                      | 0.033   |
| LTC4S        | 2.07                                      | 0.048   |
| MAP2K4P1     | 2.16                                      | 0.035   |
| H4C12        | 2.18                                      | 0.050   |
| CCDC183-AS1  | 2.21                                      | 0.040   |
| BHLHE41      | 2.22                                      | 0.027   |
| CALML3       | 2.23                                      | 0.018   |
| FAHD2CP      | 2.32                                      | 0.026   |
| CREB3L1      | 2.39                                      | 0.028   |
| ANKAR        | 2.46                                      | 0.019   |
| ATP6V1G2     | 2.53                                      | 0.014   |
| IGFBP5       | 2.72                                      | 0.047   |
| TCTEX1D4     | 2.90                                      | 0.016   |
| ITGAM        | 3.26                                      | 0.015   |
| HSD17B3      | 3.40                                      | 0.046   |

| Gene            | Fold Change (AHRi +PGN vs CTRLi +PGN) | P-value |
|-----------------|---------------------------------------|---------|
| KRT4            | -13.74                                | 0.006   |
| CYP1B1          | -7.92                                 | 0.042   |
| CYP1A1          | -4.97                                 | 0.005   |
| AHR             | -3.70                                 | 0.002   |
| PHOSPHO2-KLHL23 | -3.39                                 | 0.045   |
| NPIP9           | -2.38                                 | 0.042   |
| SPRR2D          | -2.20                                 | 0.016   |
| LOC101928069    | -2.17                                 | 0.037   |
| LRRC7           | -2.13                                 | 0.043   |
| ANKRD2          | -2.08                                 | 0.027   |
| DLX2            | -2.00                                 | 0.044   |
| GPAT3           | -1.97                                 | 0.029   |
| SPRR2B          | -1.97                                 | 0.045   |
| RBM26-AS1       | -1.94                                 | 0.040   |
| LINC00673       | -1.90                                 | 0.041   |
| AREG            | -1.85                                 | 0.007   |
| IL1B            | -1.81                                 | 0.013   |
| EREG            | -1.73                                 | 0.039   |
| IER3            | -1.63                                 | 0.035   |
| TIPARP          | -1.61                                 | 0.026   |
| ADGRF1          | -1.61                                 | 0.013   |
| UPP1            | -1.57                                 | 0.036   |
| C1QTNF6         | -1.53                                 | 0.026   |
| TXNRD1          | -1.52                                 | 0.035   |
| GSTM2           | 1.55                                  | 0.043   |
| SYNPO           | 1.57                                  | 0.040   |
| MT1X            | 1.57                                  | 0.010   |
| PNRC1           | 1.59                                  | 0.018   |
| FN1             | 1.60                                  | 0.034   |
| C1R             | 1.66                                  | 0.024   |
| PGM2L1          | 1.66                                  | 0.034   |
| RAB15           | 1.66                                  | 0.029   |
| H19             | 1.71                                  | 0.049   |
| SERPINF2        | 1.75                                  | 0.037   |
| PALMD           | 1.79                                  | 0.034   |
| SERPINB4        | 1.81                                  | 0.020   |
| RCAN1           | 1.81                                  | 0.049   |
| S1PR3           | 1.84                                  | 0.025   |
| DGUOK-AS1       | 1.84                                  | 0.039   |
| APCDD1          | 1.87                                  | 0.008   |
| C1S             | 1.88                                  | 0.032   |
| ATP8A1          | 1.93                                  | 0.043   |
| CA12            | 1.97                                  | 0.035   |
| WNT3            | 2.03                                  | 0.006   |



|             |       |       |
|-------------|-------|-------|
| FBLN2       | 2.09  | 0.013 |
| HSPA1L      | 2.14  | 0.041 |
| ESPNL       | 2.14  | 0.034 |
| TSSK3       | 2.20  | 0.029 |
| CHI3L2      | 2.21  | 0.037 |
| CREB3L1     | 2.26  | 0.041 |
| DLX4        | 2.29  | 0.024 |
| LINC00266-1 | 2.30  | 0.031 |
| CALML3      | 2.40  | 0.012 |
| BHLHE41     | 2.49  | 0.016 |
| MAF         | 2.50  | 0.018 |
| SCOC-AS1    | 2.51  | 0.040 |
| CD101       | 2.53  | 0.020 |
| MCHR1       | 2.60  | 0.035 |
| RGPD1       | 2.63  | 0.036 |
| PIK3CD-AS2  | 2.68  | 0.048 |
| GABRQ       | 2.69  | 0.033 |
| WNT4        | 2.79  | 0.039 |
| COL21A1     | 2.86  | 0.045 |
| IGFBP5      | 3.14  | 0.019 |
| TLCD4-RWDD3 | 3.18  | 0.008 |
| CLDN8       | 3.43  | 0.047 |
| SNORA73A    | 3.58  | 0.030 |
| KIF12       | 3.96  | 0.011 |
| CXCL14      | 4.28  | 0.024 |
| PAPPA       | 4.31  | 0.011 |
| CD248       | 4.87  | 0.005 |
| SNORD3A     | 10.16 | 0.009 |
